# Supplementary material for: In Silico Elucidation of Potent Inhibitors from Natural Products for Nonstructural Proteins of Dengue Virus
Source: Hindawi journal article supplement (doi:10.1155/2022/5398239), 2022-07-09
Supplement: f1 [file 5398239.f1.docx]

***In Silico* Elucidation of Potent Inhibitors from Natural Products for Nonstructural Proteins of Dengue Virus**

Bibek Raj Bhattarai1, Bikash Adhikari1, Saroj Basnet2, Asmita Shrestha1, Rishab Marahatha1, Babita Aryal1, Binod Rayamajhee3, Pramod Poudel4, and Niranjan Parajuli1*

**Table 1S**: Some anti-dengue compounds from natural products

| **Sources** | **Compounds** | **Types/**  **Target** | **IC50** | **EC50** | **Active serotypes** | **References** |
| --- | --- | --- | --- | --- | --- | --- |
| *Camellia sinensis* (L.) Kuntze | Epigallocatechin gallate (**1**) | Protease inhibitor | - | 14.8 ± 2.6, 18.0 ± 1.0, 11.2 ± 1.7, and 13.6 ± 0.0 μM | DENV-1, DENV-2, DENV-3, and DENV-4 respectively | [1] |
| *Atalantia buxifolia* (Poir.) Oliv. ex Benth. | 5-Hydroxy-N-methylseverifoline (**2**) | Protease inhibitor | 5.3 ± 0.4 µM | - | DENV-2 | [2] |
| *Boesenbergia rotunda* (L.) | Pinostrobin (**3**) | Protease inhibitor | 76.7 ± 0.5% at 120 ppm | | DENV-2 | [3] |
| Cardamonin (**4**) | Protease inhibitor | 71.3 ± 0.3 % at 400 ppm | | DENV-2 | [3] |
| Panduratin A (**5**) | Protease inhibitor | 90.4 ± 2.3% at 400 ppm | | DENV-2 | [3] |
| 4-Hydroxypanduratin A (**6**) | Protease inhibitor | 90.4 ± 0.3% at 120 ppm | | DENV-2 | [3] |
| *Castanospermum austral*e A. Cunn. ex Mud | Castanospermine (**7**) | Protease inhibitor | - | - | DENV | [4] |
| *Palythoa mutuki* | Peridinin (**8**) | Protease inhibitor | 7.62 ± 0.17, 4.50 ± 0.46, 5.84 ± 0.19, and 6.51 ± 0.30 µM |  | DENV-1, DENV-2, DENV-3, and DENV-4 respectively | [5] |
| *Byrsonima coccolobifolia* Kunth | Agathisflavone (**9**) | Protease inhibitor | 15.1 ± 2.2 and 17.5 ± 1.4 µM |  | DENV-2 and DENV-3 | [6] |
| Myricetin (**10**) | Protease inhibitor | 22.3 ± 1.8 and 29.3 ± 3.3 µM |  |  | [6] |
| Kaempferol (**11**) | Protease inhibitor | 37.8 ± 1.4 and 27.7 ± 3.2 µM |  |  | [6] |
| *Dipteryx odorata* , *Cinnamomum cassia, Zea mays* | Coumarin (**12**) | Replication inhibitor | - | - | DENV | [7] |
| *Tephrosia madrensis, Tephrosia viridiflora, Tephrosia crassifolia* | Glabranine (**13**) | Replication inhibitor | 70% at 25 µM | | DENV-2 | [8], [9] |
| 7-O-methylglabranine (**14**) | Replication inhibitor | 70% at 25 µM | | DENV-2 | [8], [9] |
| *Arrabidaea pulchra* (Cham.) Sandwith | Caffeoylcalleryanin (**15**) | Replication inhibitor | - | 2.8 ± 0.46 µg/mL | DENV-2 | [10] |
| Verbascoside (**16**) | Replication inhibitor | - | 3.4 ± 0.4 µg/mL | DENV-2 | [10] |
| Ursolic acid (**17**) | Replication inhibitor | - | 3.2 ± 0.6 µg/mL | DENV-2 | [10] |
| *Anacolosa pervilleana* Baill. | Anacolosine (**18**) | Replication inhibitor | 2.5 ± 0.1 µM | - | DENV | [11] |
| Lupenone (**19**) | Replication inhibitor | >10 µM | - | DENV | [11] |
| β-Amyrone (**20**) | Replication inhibitor | >10 µM | - | DENV | [11] |
| (S)-Sambunigrin (**21**) | Replication inhibitor | >10 µM | - | DENV | [11] |
| *Gardenia collinsae* (Craib) | DHTMF (**22**) | Replication inhibitor | - | 5.62 µg/mL | DENV | [12] |
| HPMF (**23**) | Replication inhibitor | - | 4.47 µg/mL | DENV | [12] |
| *Scutellaria baicalensis* Georgi. | Baicalin (**24**) | Replication inhibitor | 8.74 ± 0.08 µg/mL | - | DENV-2 | [13] |
|  | Fisetin (**25**) | Replication inhibitor | 43.12 µg/mL | - | DENV-2 | [14] |
| *Acorus calamus* | Tatanan A (**26**) | Replication inhibitor | - | 3.9 µM | DENV-2 | [15] |
|  | Querectin (**27**) | Replication inhibitor | 35.7 µg/mL | - | DENV-2 | [16] |
| Daidzein (**28**) | Replication inhibitor | 142.6 µg/mL | - | DENV-2 | [16] |
| Naringin (**29**) | Replication inhibitor | 168.2 µg/mL | - | DENV-2 | [16] |
| *Distictella elongata* (Vahl) Urb. | Pectolinarin (**30**) | Replication inhibitor | - | 86.4 ± 3.8 µg/mL | DENV | [17] |
| Acacetin-7-O-rutinoside (**31**) | Replication inhibitor | - | - | DENV | [17] |

**Table 2S:** Details about molecular docking platform

| Subject | Pharmaceutical Science |
| --- | --- |
| Speciﬁc subject area | Interdisciplinary fields include organic chemistry, biochemistry, and biology. Drug design and discovery. |
| Type of data | Tables and Figures |
| How data were acquired | MOE 2009 and GOLD V 4.0.1 |
| Data format | Raw and Analysed |
| Parameters for data collection | Gold Fitness score, energetic values, and interactions of the protein with the ligand. |
| Description of data collection | The protein was collected from the RCSB protein bank. The secondary metabolite structures were obtained from the PubChem online database. The docking was done using GOLD software and Autodock Vina. |
| Data source location | <https://www.rcsb.org/>, <https://pubchem.ncbi.nlm.nih.gov/> |
| Data accessibility | PDB ﬁles of the chosen enzyme targets are publically available at <https://www.rcsb.org/> Tables and Figures of the docking are accessible in the article. |

Value of the Data

- The screening procedure enables the researchers to rapidly identify active natural compounds that can modulate a particular biochemical pathway.
- The screening results help to study the interaction/role of active metabolites in a particular biochemical process at the cellular level and provide preliminary ideas for drug design development
- By using this *in-silico* docking data, novel synthetic analogs with improved bioactivity and minimized side effects can be developed against these targets, and research time can be minimized considerably.
- We select these 31 metabolites because these are abundant in nature and well explored. Among these metabolites, the compounds which show the best afﬁnity for various targets are shortlisted.
- The data is also useful for research scholars who do not have sufﬁcient software and hardware requirements that are not affordable by them.
- Research scholars, researchers in pharmaceutical chemistry, Medicinal Chemistry, Drug Design Industry can beneﬁt from the data.

**Table 3S:** List of Targets showing the PDB ID, resolution and description of the proteins selected for docking with complexed inhibitor

| **PDB ID** | **Resolution (Å)** | **Description** |
| --- | --- | --- |
| 2FOM | 2.22 | Crystal Structure of the Dengue Virus NS2B/NS3 Protease |
| 2J7U | 2.8 | Crystal Strucure of the Dengue Virus RNA-Dependent RNA NS5 Polymerase Catalytic Domain |

**Table 4S:** Active Site residues of NS2B/NS3 Protease and NS5 polymerase

| **PDB ID** | **Name of the Organism** | **Active Site Residues** |
| --- | --- | --- |
| 2FOM | Dengue virus 2 | Arg 482, Asn 127, Glu 197, Ile 487, Trp 485, Ser 486, His 491, Ala 489, Lys 123, Thr 126, Ser 481 |
| 2J7U | Dengue virus | Asn 196, Lys 103, Gly 116, Leu 114, Leu, 178, Trp 112, Trp 118, Thr 149, Val 175, Ile 194, Asn 181, Ala 193, Asn 181 |

**Table 5S:** H-bonding interaction of Nelfinavir and Natural metabolites with DENV NS2B/NS3 Protease (2FOM) with bond length, interacting residues, GOLD fitness score, and experimental IC50 values

| SN. | Compound Name | GOLD fitness score | Calculated binding energy (∆G) (kcal/mol) | IC50 Value | H-bonding residues within 4AO Radius | Bond Length | Other interaction with resides |
| --- | --- | --- | --- | --- | --- | --- | --- |
| Reference | Nelfinavir | 41.21 | -8.0 | - | Trp 118 | 1.4 | - |
| 1. | Pinostrobin (**3**) | 44.99 | -7.7 | 76.7 ± 0.5% at 120 ppm | Trp 112  Leu 178 | 2.0  1.8 | - |
| 2. | 5-Hydroxy-N-methylseverifoline (**2**) | 43.85 | -7.7 | 5.3 ± 0.4 | Asn 196 | 2.2 | - |
| 3. | Naringin (**29**) | 41.72 | -8.4 | - | Val 175  Gly 116  Leu 114 | 2.0/2.4  3.8  2.4/2.5 | - |
| 4. | Kaempferol (**11**) | 40.29 | -6.8 | 27-37.8 | Leu 178 | 2.1 | - |
| 5. | Cardamonin (**4**) | 39.94 | -6.7 | 71.3 ± 0.3 % at 400 ppm | Leu 178  Trp 112 | 1.8  1.6 | - |
| 6. | Quercetin (**27**) | 38.44 | -7.7 | - | Trp 112 | 1.9 | - |
| 7. | Myricetin (**10**) | 36.88 | -7.7 | 22-29.3 | Asn 181  Leu 178  Val 175  Leu 114 | 2.7  2.1  1.3  3.7 | - |
| 8. | Daidzem (**28**) | 33.46 | -7.6 | 560.89 | Trp 112 | 1.8 | - |
| 9. | Coumarin (**12**) | 30.67 | -5.6 | - | - | - | - |
| 10. | Castanospermine (**7**) | 29.28 | -5.6 | - | Leu 178 | 2.2 | - |

**Table 6S:** H-bonding interaction of Balapiravir and Natural metabolites with DENV NS5 Polymerase (2J7U) with bond length, interacting residues, GOLD fitness score, and experimental IC50 values

| SN. | Compound Name | GOLD fitness score | Calculated binding energy (∆G) (kcal/mol) | IC50/ EC50  (µM) | H-bonding residues within 4AO Radius | Bond Length | Other interaction with resides |
| --- | --- | --- | --- | --- | --- | --- | --- |
| Reference | Balapiravir | 49.42 | -12.1 | - | Arg 482  Asn 127 | 1.6 / 2.3  2.0 | - |
| 1. | Verbascoside (**16**) | 39.12 | -8 | 5.44 ± 0.64 | Arg 482  Asn 127  Thr 126  Lys 122  Lys 123 | -  3.1  2.8  1.8  2.2/2.2 | Π-Cation |
| 2. | Sambunigrin (**21**) | 37.49 | -7.3 | >10 | Thr 126  Asn 127  Arg 482 | 2.8  2.3  1.9/2.5 | Π-Cation |
| 3. | Baicalin (**24**) | 36.41 | -8.9 | 19.58 ± 0.18 | Arg 482  Lys 123  Glu 197  Asn 182 | 1.8  2.6/1.6/2.5  2.9  2.0 | Π-Cation  Π-Cation |
| 4. | 5-Hydroxy-6,7,3′,4′,5′-pentamethoxyflavone or umuhengerin (HPMF) (**23**) | 35.92 | -7.2 | 11.51 | Thr 126  Arg 482 | 3.7  1.7 | - |
| 5. | 5,3'-dihydroxy-6,7,4′,5′-tetramethoxyflavone (DHTMF) (**22**) | 32.71 | -7.5 | 15.02 | Arg 482 |  | Π-Cation |
| 6. | Quercetin (**27**) | 31.71 | -7.3 | 118.12 | Glu 197  Arg 482  Asn 127 | 1.9  2.0  2.0 | - |
| 7. | Daidzein (**28**) | 31.70 | -7.4 | 560.89 | Glu 197 | 2.0 | - |
| 8. | Caumarin (**12**) | 31.66 | -5.5 | - | Glu 183 | 1.7 | - |
| 9. | Fisetin (**25**) | 30.59 | -7.5 | 150.64 | Arg 482 | 1.6 | Π-Cation |
| 10. | Tatanan A (**26**) | 27.29 | -6.5 | 3.9 | Asn 182 | 2.4 | - |
| 11. | β-Amyrone (**20**) | 9.67 | -9.5 | >10 | Arg 482 | 1.7 | - |
| 12. | Lupenone (**19**) | 7.74 | -9.1 | >10 | - | - | - |
| 13. | Ursolic acid (**17**) | 5.26 |  | 7.06 ± 1.32 | - | - | - |

**Table 7S:** Molecular Properties of standard compounds and selected secondary metabolites

| **Compound Name** | **Vdw** | **Elec** | **Weight** | **logP** | **TPSA** | **Donar** | **Acceptor** |
| --- | --- | --- | --- | --- | --- | --- | --- |
| Nelfinavir | 74.047 | 1.478 | 567.795 | 4.748 | 101.900 | 4 | 5 |
| Balapiravir | 46.157 | -54.091 | 494.505 | 1.822 | 184.210 | 1 | 8 |
| Epigallocatechin gallate (**1**) | 68.875 | -32.230 | 458.375 | 2.329 | 197.370 | 8 | 10 |
| 5-Hydroxy-N-methylseverifoline (**2**) | 77.794 | -10.161 | 391.467 | 5.103 | 70.00 | 2 | 4 |
| Pinostrobin (**3**) | 49.728 | -17.031 | 270.284 | 3.203 | 55.760 | 1 | 4 |
| Cardamonin (**4**) | 51.344 | -18.234 | 270.284 | 3.003 | 66.760 | 2 | 4 |
| Panduratin A (**5**) | 69.834 | -15.067 | 406.522 | 6.012 | 66.760 | 2 | 4 |
| 4-Hydroxypanduratin A (**6**) | 65.668 | -15.259 | 392.495 | 5.709 | 77.760 | 3 | 4 |
| Castanospermine (**7**) | 33.108 | -20.545 | 189.211 | -3.461 | 88.190 | 4 | 4 |
| Peridinin (**8**) | 69.061 | -6.067 | 630.822 | 7.208 | 105.590 | 2 | 5 |
| Agathisflavone (**9**) | 98.885 | -36.302 | 538.464 | 4.820 | 173.980 | 6 | 8 |
| Myricetin (**10**) | 52.086 | -18.631 | 318.237 | 1.717 | 147.680 | 6 | 7 |
| Kaempferol (**11**) | 47.489 | -12.436 | 286.239 | 2.305 | 107.220 | 4 | 5 |
| Coumarin (**12**) | 21.277 | 0.262 | 146.145 | 1.619 | 26.300 | 0 | 1 |
| Glabranine (**13**) | 55.054 | -14.984 | 324.376 | 4.408 | 66.760 | 2 | 4 |
| 7-O-methyl Glabranine(**14**) | 58.163 | -1.932 | 352.430 | 5.014 | 44.760 | 0 | 4 |
| Caffeoylcalleryanin (**15**) | 62.017 | -7.855 | 462.451 | 0.211 | 177.140 | 7 | 9 |
| Verbacoside (**16**) | 73.342 | 0.536 | 624.592 | -1.016 | 245.290 | 9 | 14 |
| Ursolic Acid (**17**) | 86.130 | -1.070 | 455.703 | 5.755 | 60.360 | 1 | 3 |
| Anacolosine (**18**) | 14.117 | -8.590 | 236.267 | -0.223 | 80.260 | 0 | 4 |
| Lupenone (**19**) | 73.499 | 2.166 | 424.713 | 8.233 | 17.070 | 0 | 1 |
| β-Amyrone (**20**) | 81.481 | 2.091 | 424.713 | 8.377 | 17.070 | 0 | 1 |
| Sambunigrin (**21**) | 30.788 | 19.328 | 295.291 | -0.837 | 123.170 | 4 | 7 |
| DHMTF (**22**) | 69.614 | -18.804 | 374.345 | 2.748 | 103.680 | 2 | 7 |
| HPMF (**23**) | 70.566 | -2.835 | 388.372 | 3.051 | 92.680 | 1 | 7 |
| Baicalin (**24**) | 71.472 | 8.885 | 460.347 | -1.026 | 209.100 | 5 | 11 |
| Fisetin (**25**) | 44.920 | -8.875 | 286.239 | 2.305 | 107.220 | 4 | 5 |
| Tatanan A (2**6**) | 112.609 | -7.499 | 624.771 | 7.781 | 83.070 | 0 | 9 |
| Quercetin (**27**) | 49.219 | -12.932 | 302.238 | 2.011 | 127.450 | 5 | 6 |
| Daidzein (**28**) | 42.165 | -5.719 | 254.241 | 2.714 | 66.760 | 2 | 3 |
| Naringin (**29**) | 81.729 | -0.664 | 580.539 | -1.070 | 225.060 | 8 | 14 |
| Pectolinarin (**30**) | 100.160 | -5.858 | 621.568 | -0.506 | 226.120 | 6 | 14 |
| Linarin (**31**) | 92.931 | -9.427 | 591.542 | -0.514 | 216.890 | 6 | 13 |

Where: Vdw = Van der waals energy, Elect = Electrostatic energy, logP =Partition coefficient, TPSA =Total polar surface area

**Table 8S:** Binding Free Energy calculations for NS2B/NS3 Protease with inhibitors using semi-empirical method

| **NS2B/NS3 Protease** | **Theoritical binding energy (∆G Calc. ) (Kcal/mol)** | **Experimental binding energy (Kcal/mol)** | **IC50 (µM)** | **pIC50** |
| --- | --- | --- | --- | --- |
| Epigallocatechin gallate (**1**) | -7.7 | - | - | - |
| 5-hydroxy-N-methylseverifoline (**2**) | -7.7 | -8.24 | 5.3 | 8.27 |
| Pinostrobin (**3**) | -7.7 | - | - | - |
| Cardamonin (**4**) | -6.7 | - | - | - |
| Panduratin A (**5**) | -7.9 | - | - | - |
| 4-hydroxypanduratin A (**6**) | -7 | - | - | - |
| Castanospermine (**7**) | -5.6 | - |  | - |
| Peridinin (**8**) | -7.9 | -8.94 | 7.62 | 9.88 |
| Agathisflavone (**9**) | -8.6 | -8.02 | 15.1 | 7.82 |
| Myricetin (**10**) | -7.7 | -7.94 | 22.3 | 7.65 |
| Kaempferol (**11**) | -6.8 | -7.82 | 37.8 | 7.42 |
| Coumarin (**12**) | -5.6 | - | - | - |
| Quercetin (**27**) | -7.7 | -7.55 | 11.8 | 6.92 |
| Diadzein (**28**) | -7.6 | -7.15 | 560.89 | 6.25 |
| Naringin (**29**) | -8.4 | -7.3 | 289.75 | 6.53 |
| Pectolinarin (**30**) | -7.8 | - | - | - |
| Acacetin-7-O-rutinoside (**31**) | -14.2 | - | - | - |

**Table 9S:** Binding Free Energy calculations for NS5 polymerase with inhibitors using semi-empirical method

| **NS5 Polymerase** | **Theoritical binding energy (∆G Calc. ) (Kcal/mol)** | **Experimental binding energy (Kcal/mol)** | **IC50 (µM)** | **pIC50** |
| --- | --- | --- | --- | --- |
| Caumarin (**12**) | -5.5 | - | - | - |
| Glabranine (**13**) | -7.8 | -7.91 | 25 | 7.6 |
| 7-O-methyl glabranine (**14**) | -7.5 | -7.91 | 25 | 7.6 |
| Caffeoyl calleryanins (**15**) | -7.7 | - | - | - |
| Verbacoside (**16**) | -8 | - | - | - |
| Ursolic acid (**17**) | -7.3 | - | - | - |
| Anancolosine (**18**) | -5.2 | -8.4 | 2.5 | 8.6 |
| Lupenone (**19**) | -9.1 | >-8.11 | >10 | >8 |
| Beta amyrone (**20**) | -9.5 | >-8.11 | >10 | >8 |
| Sambunigrin (**21**) | -7.3 | >-8.11 | >10 | >8 |
| DHTMF (**22**) | -7.5 | - | - | - |
| HPMF (**23**) | -7.2 | - | - | - |
| Baicalin (**24**) | -8.9 | -7.96 | 19.58 | 7.70 |
| Fisetin (**25**) | -7.5 | -7.49 | 150.64 | 6.82 |
| Tatanan A (**26**) | -6.5 | - | - | - |
| Quercetin (**27**) | -7.3 | -7.55 | 118.12 | 6.82 |
| Diadzein (**28**) | -7.4 | -7.15 | 560.89 | 6.82 |
| Naringin (**29**) | -9.0 | -7.3 | 289.75 | 6.82 |
| Pectolinarin (**30**) | -8.0 | - | - | - |
| Acacetin-7-O-rutinoside (**31**) | -13.9 | - | - | - |

**Table 10S**: Prediction of toxicity of selected compounds from natural products by ProTox-II

| **Compound Name** | **LD50 mg/kg** | **Toxicity Class** | **Active Target** | **Probability** |
| --- | --- | --- | --- | --- |
| Nelfinavir | 600 | 4 | Immunotoxicity | 0.83 |
| Balapiravir | 826 | 4 | Hepatotoxicity  Carcinogenicity  Mutagenicity | 0.55  0.56  0.67 |
| Epigallocatechin gallate (**1**) | 1000 | 4 | - | - |
| 5-Hydroxy-N-methylseverifoline (**2**) | 522 | 4 | Immunotoxicity  Mutagenicity | 0.98  0.54 |
| Pinostrobin (**3**) | 2000 | 4 | Carcinogenicity  Aryl hydrocarbon Receptor (AhR)  Estrogen Receptor Alpha (ER)  Estrogen Receptor Ligand Binding Domain (ER-LBD)  Mitochondrial Membrane Potential (MMP)  ATPase family AAA domain containing protein 5 (ATAD5) | 0.53  0.51  0.68  0.54  0.68  0.51 |
| Cardamonin (**4**) | 1000 | 4 | Immunotoxicity  Estrogen Receptor Alpha (ER)  Estrogen Receptor Ligand Binding Domain (ER-LBD)  Mitochondrial Membrane Potential (MMP)  ATPase family AAA domain containing protein 5 (ATAD5) | 0.97  0.65  0.55  0.97  0.53 |
| Panduratin A (**5**) | 2000 | 4 | Nuclear factor (erythroid-derived 2)-like 2/antioxidant responsive element (nrf2/ARE)  Heat shock factor response element (HSE)  Mitochondrial Membrane Potential (MMP) | 0.51  0.51  0.80 |
| 4-Hydroxypanduratin A (**6**) | 750 | 4 | Mitochondrial Membrane Potential (MMP)  Phosphoprotein (Tumor Suppressor) p53 | 0.86  0.54 |
| Castanospermine (**7**) | 3500 | 5 | - | - |
| Peridinin (**8**) | 55 | 3 | Immunotoxicity  Mutagenicity | 0.99  0.52 |
| Agathisflavone (**9**) | 2430 | 5 | Aryl hydrocarbon Receptor (AhR)  Mitochondrial Membrane Potential (MMP)  ATPase family AAA domain containing protein 5 (ATAD5) | 0.83  0.78  0.77 |
| Myricetin (**10**) | 159 | 3 | Aryl hydrocarbon Receptor (AhR)  Estrogen Receptor Alpha (ER)  Estrogen Receptor Ligand Binding Domain (ER-LBD)  Mitochondrial Membrane Potential (MMP) | 0.91  0.87  0.95  1.0 |
| Kaempferol (**11**) | 5000 | 5 | - | - |
| Coumarin (**12**) | 196 | 3 | Carcinogenicity  Cytotoxicity | 0.83  0.55 |
| Glabranine (**13**) | 2000 | 4 | Immunotoxicity  Mitochondrial Membrane Potential (MMP) | 0.53  0.69 |
| 7-O-methyl Glabranine(**14**) | 2000 | 4 | Immunotoxicity | 0.89 |
| Caffeoylcalleryanin (**15**) | 5000 | 5 | Immunotoxicity | 0.84 |
| Verbacoside (**16**) | 5000 | 5 | Immunotoxicity | 0.99 |
| Ursolic Acid (**17**) | 2000 | 4 | Hepatotoxicity  Carcinogenicity  Immunotoxicity  Nuclear factor (erythroid-derived 2)-like 2/antioxidant responsive element (nrf2/ARE)  Heat shock factor response element (HSE) | 0.52  0.57  0.95  0.70  0.70 |
| Anacolosine (**18**) | 225 | 3 | - | - |
| Lupenone (**19**) | 5000 | 5 | - | - |
| β-Amyrone (**20**) | 4500 | 5 | Immunotoxicity | 0.64 |
| Sambunigrin (**21**) | 560 | 4 | - | - |
| DHMTF (**22**) | 5000 | 5 | Immunotoxicity  Aryl hydrocarbon Receptor (AhR)  Estrogen Receptor Alpha (ER)  Estrogen Receptor Ligand Binding Domain (ER-LBD)  Mitochondrial Membrane Potential (MMP)  ATPase family AAA domain containing protein 5 (ATAD5) | 0.88  0.84  0.62  0.58  0.83  0.68 |
| HPMF (**23**) | 5000 | 5 | Immunotoxicity  Aryl hydrocarbon Receptor (AhR)  Estrogen Receptor Alpha (ER)  Estrogen Receptor Ligand Binding Domain (ER-LBD)  Mitochondrial Membrane Potential (MMP)  ATPase family AAA domain containing protein 5 (ATAD5) | 0.89  0.86  0.58  0.54  0.81  0.69 |
| Baicalin (**24**) | 5000 | 5 | Carcinogenicity | 0.50 |
| Fisetin (**25**) | 159 | 3 | Carcinogenicity  Aryl hydrocarbon Receptor (AhR)  Estrogen Receptor Alpha (ER)  Estrogen Receptor Ligand Binding Domain (ER-LBD)  Mitochondrial Membrane Potential (MMP) | 0.71  0.84  0.69  0.86  0.82 |
| Tatanan A (2**6**) | 418 | 4 | Nuclear factor (erythroid-derived 2)-like 2/antioxidant responsive element (nrf2/ARE)  Heat shock factor response element (HSE)  Mitochondrial Membrane Potential (MMP) | 0.51  0.51  0.59 |
| Quercetin (**27**) | 159 | 3 | Carcinogenicity  Mutagenicity  Aryl hydrocarbon Receptor (AhR)  Estrogen Receptor Alpha (ER)  Estrogen Receptor Ligand Binding Domain (ER-LBD)  Mitochondrial Membrane Potential (MMP) | 0.68  0.51  0.91  0.87  0.95  1.0 |
| Daidzein (**28**) | 2430 | 5 | Aryl hydrocarbon Receptor (AhR)  Aromatase  Estrogen Receptor Alpha (ER)  Estrogen Receptor Ligand Binding Domain (ER-LBD)  Mitochondrial Membrane Potential (MMP)  ATPase family AAA domain containing protein 5 (ATAD5) | 1.0  0.71  1.0  1.0  0.91  1.0 |
| Naringin (**29**) | 2300 | 5 | Immunotoxicity | 0.99 |
| Pectolinarin (**30**) | 5000 | 5 | Immunotoxicity  Cytotoxicity | 0.99  0.55 |
| Acacetin-7-O-rutinoside (**31**) | 5000 | 5 | Immunotoxicity  Aryl hydrocarbon Receptor (AhR) | 0.94  0.75 |

**Table 11S:** ADMET properties of NS3 protease inhibitors by pKCSM server

|  | **Parameters** | **1** | **2** | **3** | **4** | **5** | **6** | **7** | **8** | **9** | **10** | **11** | **12** |
| --- | --- | --- | --- | --- | --- | --- | --- | --- | --- | --- | --- | --- | --- |
| **Absorption** | Water solubility (log mol/L) | -2.895 | -4.144 | -3.818 | -3.55 | -6.076 | -4.813 | -1.007 | -6.585 | -2.892 | -2.941 | -3.332 | -1.446 |
| Caco2 permeability (log Papp 10-6 cm/s) | -0.797 | 1.144 | 1.264 | 1.163 | 0.74 | 1.006 | 0.36 | 0.839 | 0.371 | -0.649 | 0.627 | 1.645 |
| Intestinal absorption (% absorbed) | 57.176 | 96.414 | 95.109 | 94.414 | 94.859 | 94.602 | 58.01 | 90.674 | 94.062 | 65.116 | 81.862 | 97.314 |
| Skin permeability (log Kp) | -2.735 | -2.741 | -2.929 | -2.999 | -3.023 | -2.856 | -3.569 | -2.874 | -2.735 | -2.735 | -2.735 | -1.876 |
| **Distribution** | VDss (Human, log L/Kg) | 0.05 | -0.088 | -0.039 | -0.284 | -0.123 | -0.537 | -0.415 | -0.594 | -0.943 | 0.209 | 0.078 | -0.151 |
| BBB Permeability (logBB) | -2.209 | 0.177 | 0.155 | -0.134 | -0.058 | -1.067 | -1.012 | -0.612 | -2.192 | -1.739 | -1.143 | -0.016 |
| CNS Permeability (log PS) | -4.444 | -1.684 | -2.057 | -2.248 | -1.84 | -1.991 | -4.376 | -2.564 | -3.719 | -3.788 | -2.389 | -1.955 |
| **Metabolism** | CYP1A2 | YES | YES | YES | YES | NO | NO | NO | NO | NO | YES | YES | YES |
| CYP2C19 | NO | YES | YES | YES | YES | NO | NO | NO | NO | NO | NO | NO |
| CYP2C9 | NO | YES | NO | YES | YES | YES | NO | NO | NO | NO | NO | NO |
| CYP2D6 | NO | NO | NO | NO | NO | NO | NO | NO | NO | NO | NO | NO |
| CYP3A4 | YES | YES | NO | YES | YES | NO | NO | NO | NO | NO | NO | NO |
| **Excretion** | Renal OCT2 substrate clearance | NO | NO | NO | NO | NO | NO | NO | NO | NO | NO | NO | NO |
| Total Clearance (logml/min/kg) | 0.488 | 0.319 | 0.211 | 0.96 | 0.276 | 0.225 | 0.843 | 0.187 | 0.69 | 0.565 | 0.632 | 0.96 |
| **Toxicity** | Ames Toxicity | YES | YES | YES | YES | NO | NO | NO | NO | NO | YES | NO | NO |
| Hepatotoxicity | NO | YES | NO | NO | NO | NO | NO | NO | NO | NO | YES | NO |
| Class | 4 | 4 | 4 | 4 | 4 | 4 | 5 | 3 | 5 | 3 | 5 | 3 |

**Table 12S:** ADMET properties of NS5 polymerase inhibitors by pKCSM server

|  | **Parameters** | **13** | **14** | **15** | **16** | **19** | **20** | **21** | **22** | **23** | **24** | **25** | **26** |
| --- | --- | --- | --- | --- | --- | --- | --- | --- | --- | --- | --- | --- | --- |
| **Absorption** | Water solubility (log mol/L) | -4.512 | -5.982 | -3.092 | -2.9 | -5.7 | -6.666 | -1.366 | -4.257 | -4.437 | -2.901 | -3.251 | -4.543 |
| Caco2 permeability (log Papp 10-6 cm/s) | 0.997 | 1.49 | 0.051 | -0.66 | 1.219 | 1.232 | 0.139 | 1.137 | 1.149 | -0.647 | 0.741 | 1.171 |
| Intestinal absorption (% absorbed) | 93.268 | 97.821 | 46.315 | 20.117 | 97.733 | 96.249 | 40.183 | 78.812 | 82.821 | 19.456 | 86.735 | 100 |
| Skin permeability (log Kp) | -3.02 | -2.671 | -2.735 | -2.735 | -2.722 | -2.779 | -2.864 | -2.736 | -2.74 | -2.735 | -2.735 | -2.735 |
| **Distribution** | VDss (Human, log L/Kg) | -0.158 | 0.14 | 0.512 | 0.55 | -0.059 | 0.279 | -0.927 | -0.184 | -0.367 | 0.298 | 0.342 | -0.977 |
| BBB Permeability (logBB) | -0.089 | 0.098 | -1.915 | -1.875 | 0.766 | 0.691 | -1.233 | -0.664 | -0.997 | -1.829 | -1.13 | -1.512 |
| CNS Permeability (log PS) | -1.948 | -1.548 | -4.33 | -5.027 | --1.515 | -1.728 | -3.962 | -3.432 | -3.365 | -4.513 | -2.421 | -2.915 |
| **Metabolism** | CYP1A2 | YES | YES | NO | NO | NO | NO | NO | NO | NO | NO | YES | NO |
| CYP2C19 | YES | YES | NO | NO | NO | NO | NO | NO | YES | NO | NO | NO |
| CYP2C9 | YES | YES | NO | NO | NO | NO | NO | NO | YES | NO | NO | NO |
| CYP2D6 | NO | NO | NO | NO | NO | NO | NO | NO | NO | NO | NO | NO |
| CYP3A4 | YES | YES | NO | NO | NO | NO | NO | NO | YES | NO | NO | NO |
| **Excretion** | Renal OCT2 substrate clearance | NO | NO | NO | NO | NO | NO | NO | NO | NO | NO | NO | NO |
| Total Clearance (logml/min/kg) | 0.203 | 0.291 | 0.922 | 0.52 | 0.559 | -0.096 | 0.288 | 0.151 | 1.428 | 0.125 | 1.369 | 0.803 |
| **Toxicity** | Ames Toxicity | NO | NO | YES | NO | NO | NO | NO | NO | NO | NO | NO | NO |
| Hepatotoxicity | NO | NO | NO | NO | NO | NO | YES | NO | NO | YES | NO | NO |
| Toxicity class | 4 | 4 | 5 | 5 | 5 | 5 |  | 5 | 5 | 5 | 3 | 4 |

**Table 13S:** ADMET properties of NS3 protease and NS5 polymerase inhibitors by pKCSM server

|  | **Parameters** | **27** | **28** | **29** | **30** | **31** |
| --- | --- | --- | --- | --- | --- | --- |
| **Absorption** | Water solubility (log mol/L) | -2.982 | -2.961 | -3.012 | -3.033 | **-2.962** |
| Caco2 permeability (log Papp 10-6 cm/s) | 0.694 | 0.972 | -0.202 | -0.208 | **0.357** |
| Intestinal absorption (% absorbed) | 74.84 | 95.157 | 36.648 | 36.47 | **36.679** |
| Skin permeability (log Kp) | -2.735 | -2.783 | -2.735 | -2.735 | **-2.735** |
| **Distribution** | VDss (Human, log L/Kg) | 0.31 | 0.117 | -0.098 | -0.422 | **0.919** |
| BBB Permeability (logBB) | -1.377 | -0.049 | -1.872 | -2.265 | **-1.636** |
| CNS Permeability (log PS) | -3.416 | -2.019 | -5.037 | -5.542 | **-4.674** |
| **Metabolism** | CYP1A2 | YES | YES | NO | NO | NO |
| CYP2C19 | NO | YES | NO | NO | NO |
| CYP2C9 | NO | YES | NO | NO | NO |
| CYP2D6 | NO | NO | NO | NO | NO |
| CYP3A4 | NO | YES | NO | NO | NO |
| **Excretion** | Renal OCT2 substrate clearance | NO | NO | NO | NO | NO |
| Total Clearance (logml/min/kg) | 0.211 | 0.255 | 0.464 | 0.327 | **0.103** |
| **Toxicity** | Ames Toxicity | YES | YES | YES | NO | NO |
| Hepatotoxicity | NO | NO | NO | NO | NO |
| Toxicity class | 3 | 5 | 5 | 5 | 5 |

- **Value Range : LogS (Solubility)**: Optimal (higher than -4log mol/L) , **Papp (Caco-2 Permeability):** Optimal (higher than -5.15 Log unit or -4.70 or -4.80) , **HIA (Human Intestinal Absorption)**: >30% Perfectly absorbed , **VD (Volume Distribution)**: Optimal (0.04-20 L/Kg) , **BBB (Blood Brain Carrier):** ( BB ratio >=0.1: BBB+ ; BB ratio <0.1: BBB-) , **Total Clearance:** >15 ml/min/kg: High; 5 ml/min/kg< CL< 15ml/min/kg: Moderate; <5 ml/min/kg: Low,  **LD50( LD50 of acute toxicity):** High-toxicity: (1-50 mg/kg); Modarate-toxicity: (51-500 mg/kg); Low-Toxicity: (501-5000 mg/kg) , **ProTox-II toxicity class**: Class I: fatal if swallowed (LD50 ≤ 5); Class II: fatal if swallowed (5 < LD50 ≤ 50); Class III: toxic if swallowed (50 < LD50 ≤ 300); Class IV: harmful if swallowed (300 < LD50 ≤ 2000); Class V: may be harmful if swallowed (2000 < LD50 ≤ 5000); Class VI: non-toxic (LD50 > 5000) [18]

**
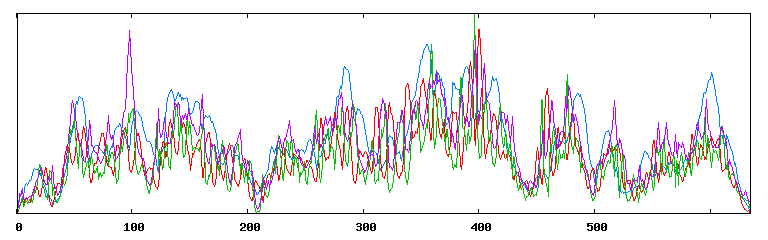
(A)**

**(B)**

**
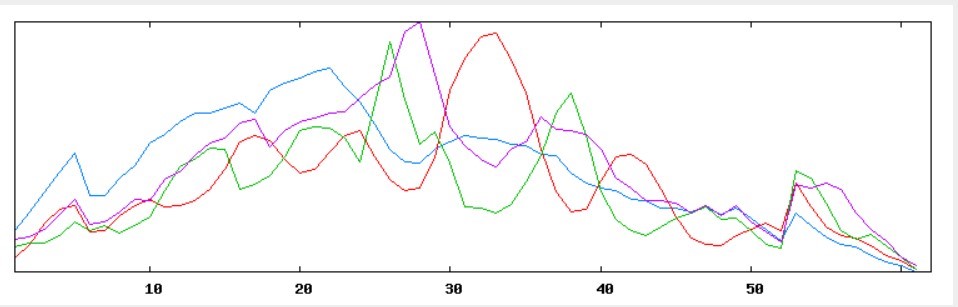
**

**(C)**

**
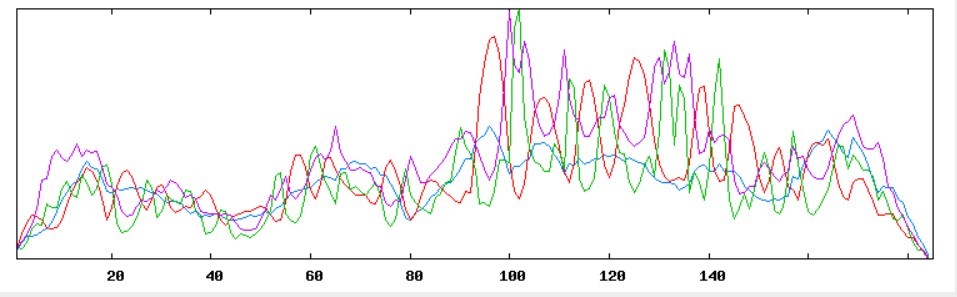
**

**Figure 1S:** (A), (B), and (C) represents the graph of secondary structure prediction of proteins NS5, NS2B/NS3 (chain A), and NS2B/NS3 (chain B) respectively analyzed using SOPMA server where blue, red, green and purple colored line represents alpha helix, extended strand, beta turn, and random coil respectively

**
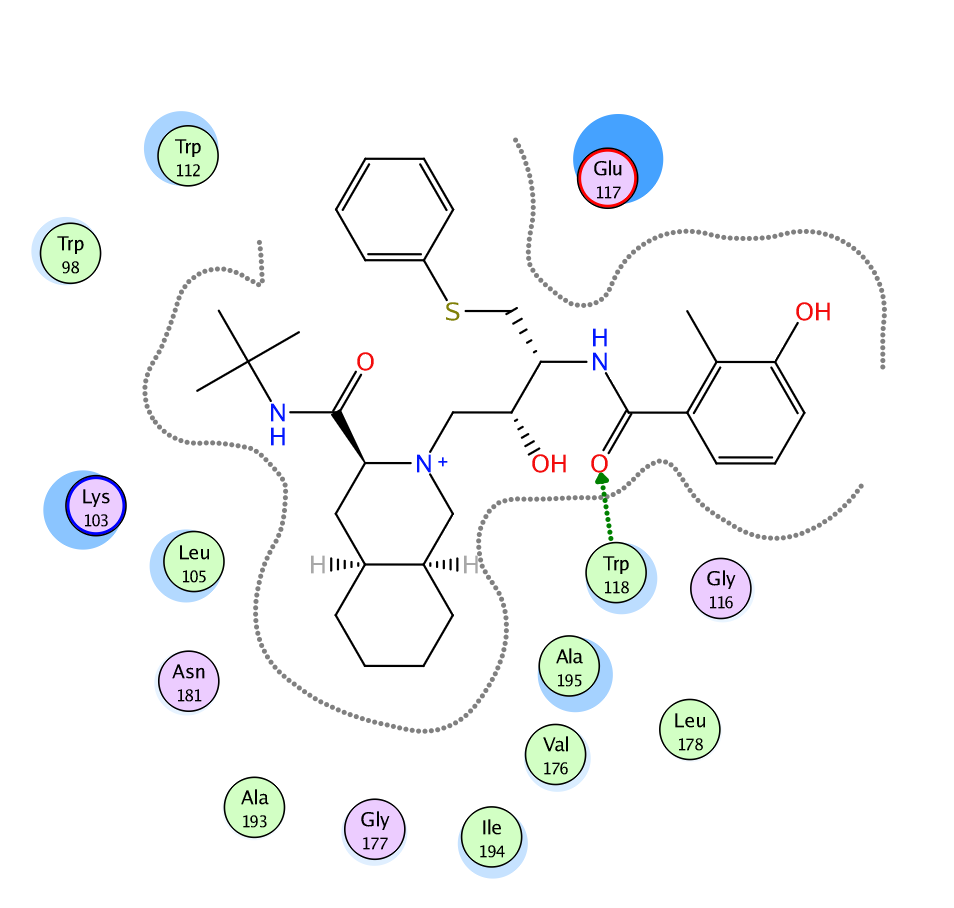
**

**
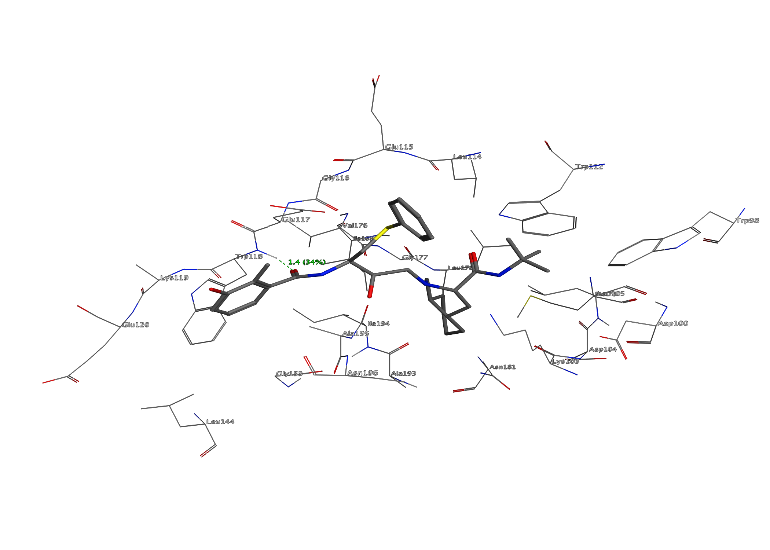
**

**Figure 2S:** 2D upper and 3D lower interaction of Nelfinavir with 2FOM (Fitness score 41.21)

**
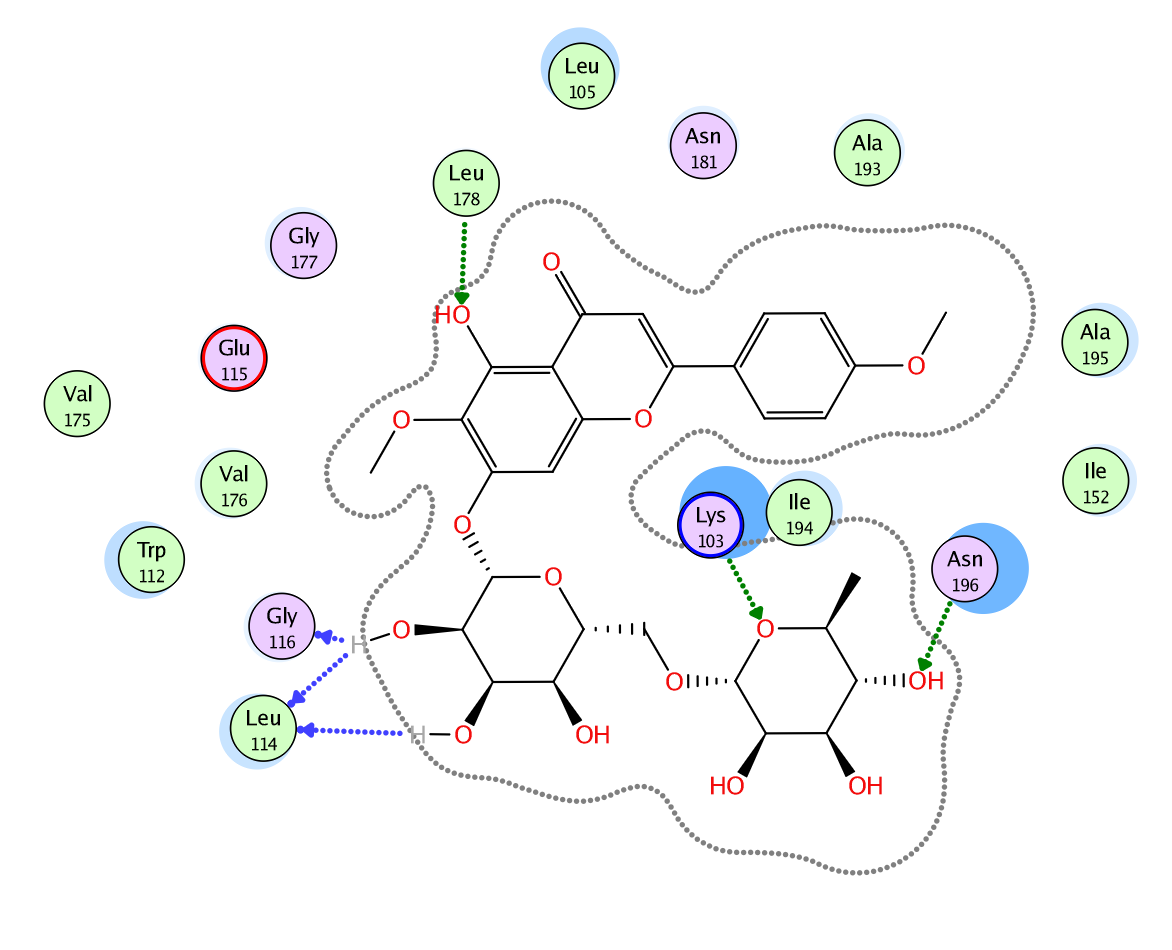
**

**
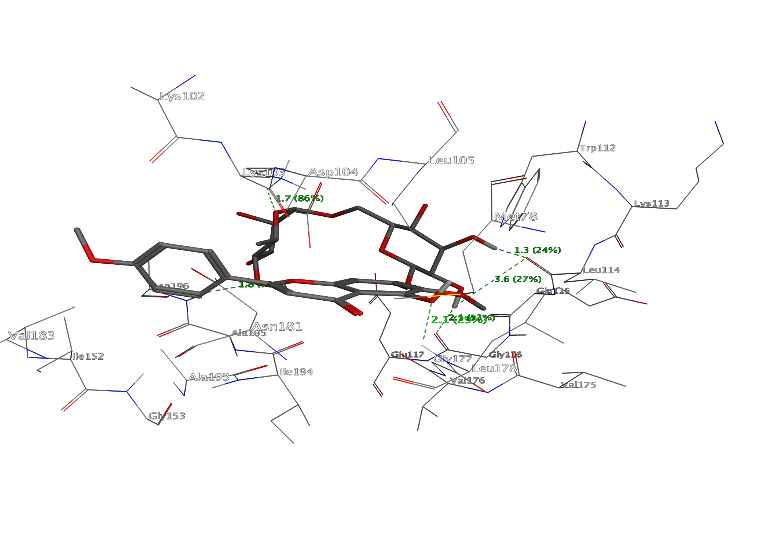
**

**Figure 3S:** Upper 2D and lower 3D interaction of pectolinarin with 2FOM (Fitness score 59.32)

**
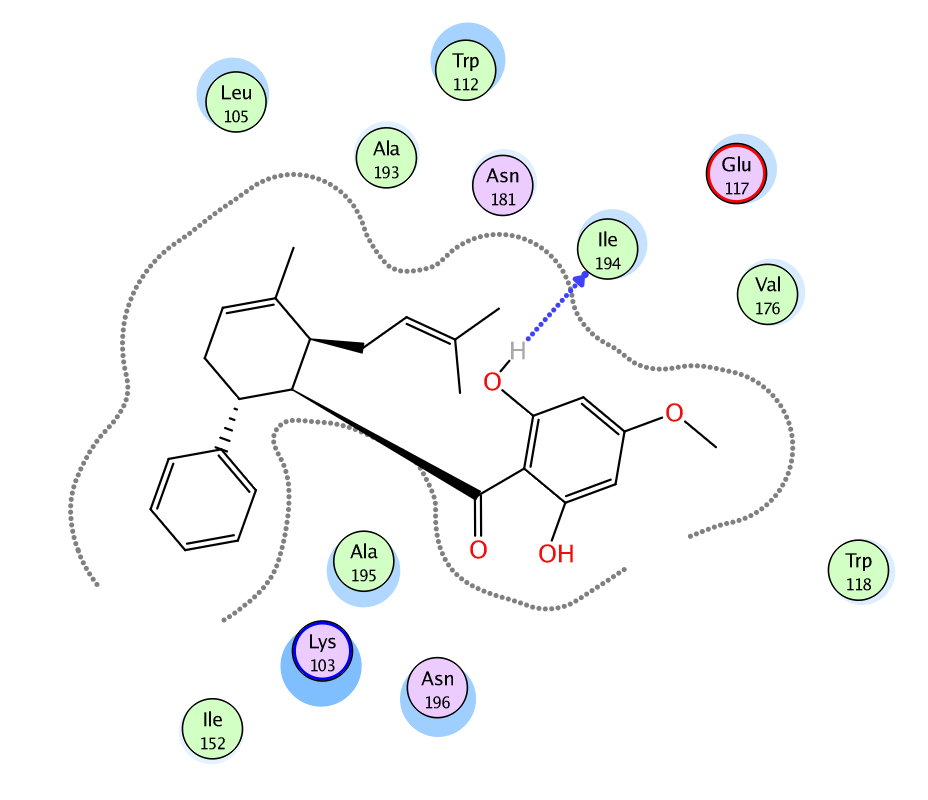
**

**
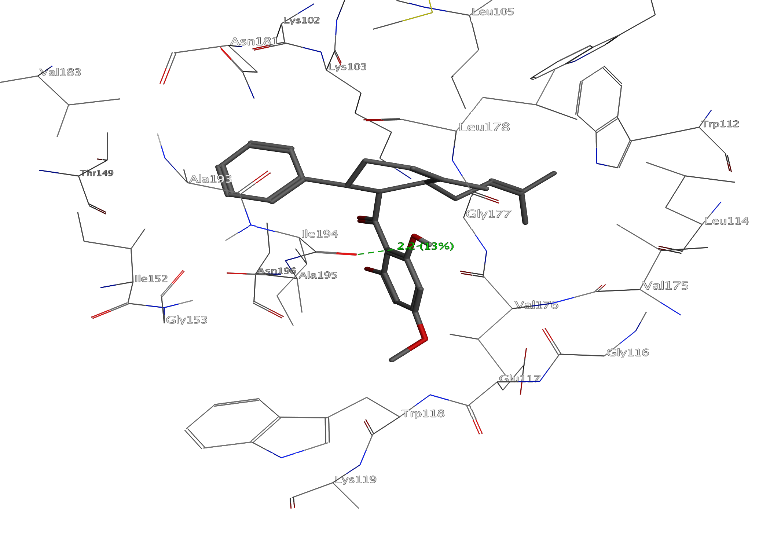
**

**Figure 4S:** Upper 2D and lower 3D interaction of panduratin A with FOM (Fitness score 54.07)

**
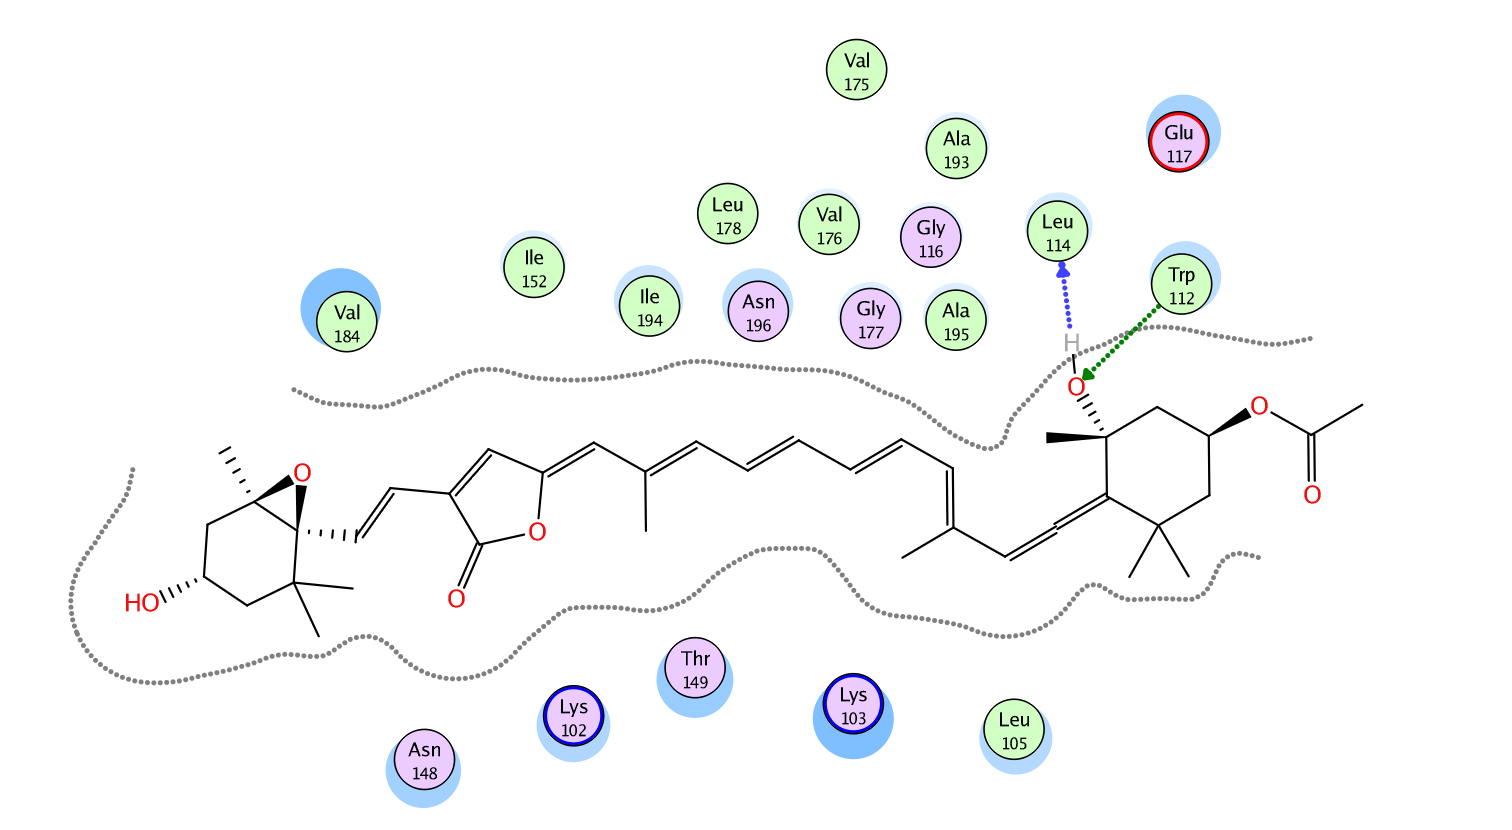
**

**
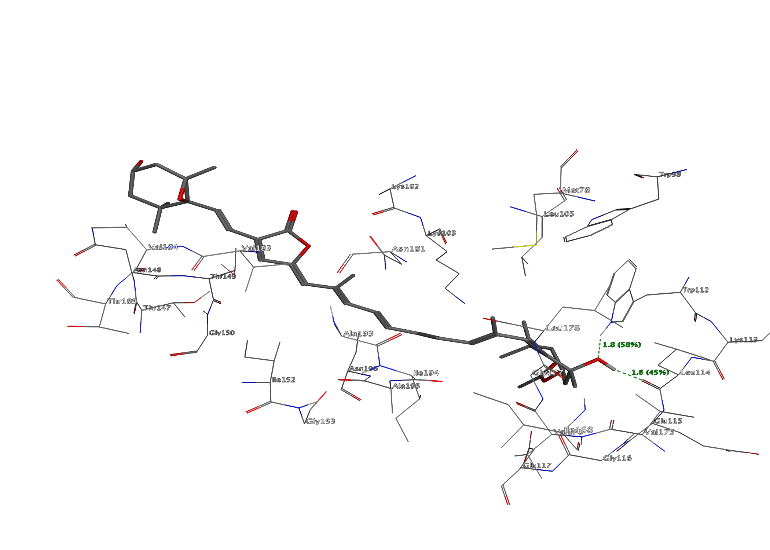
**

**Figure 5S:** Upper 2D and lower 3D interaction of peridinin with 2FOM (Fitness score 53.17)

**
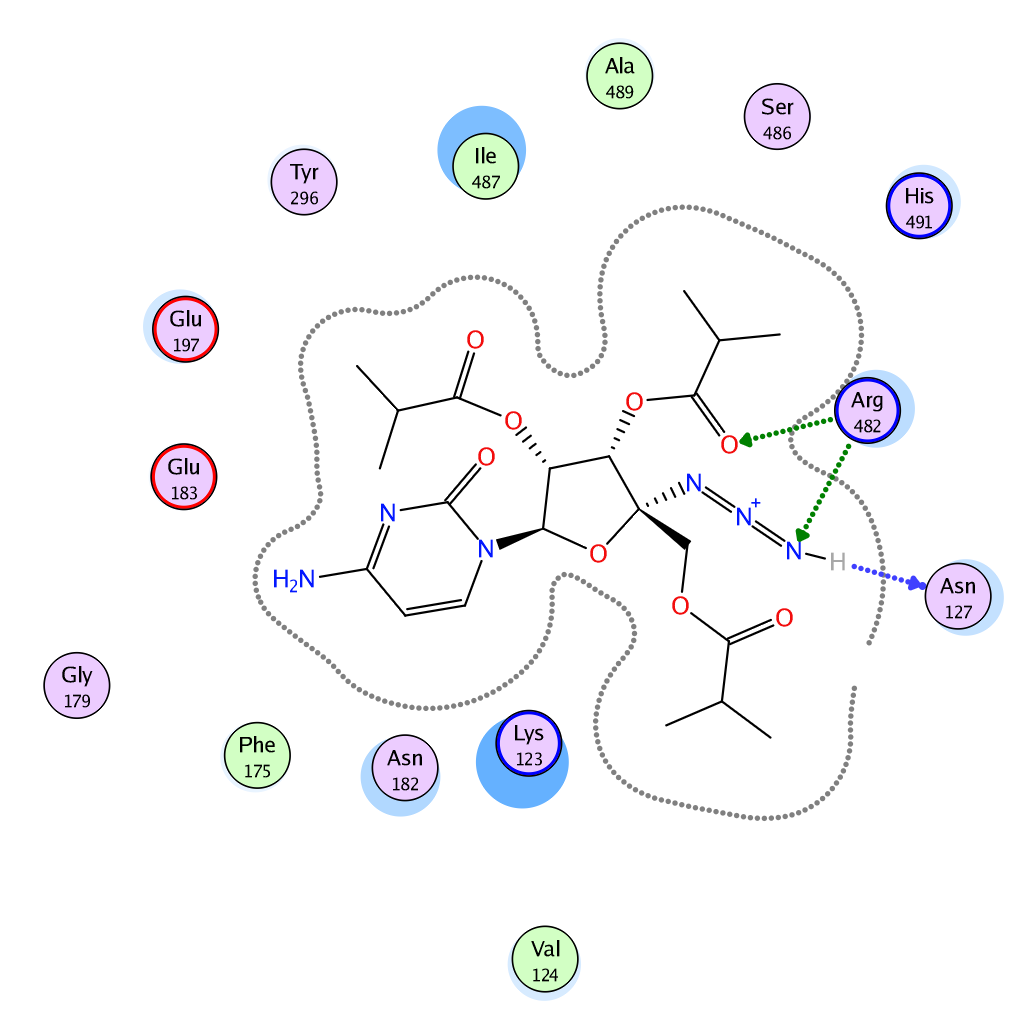
**

**
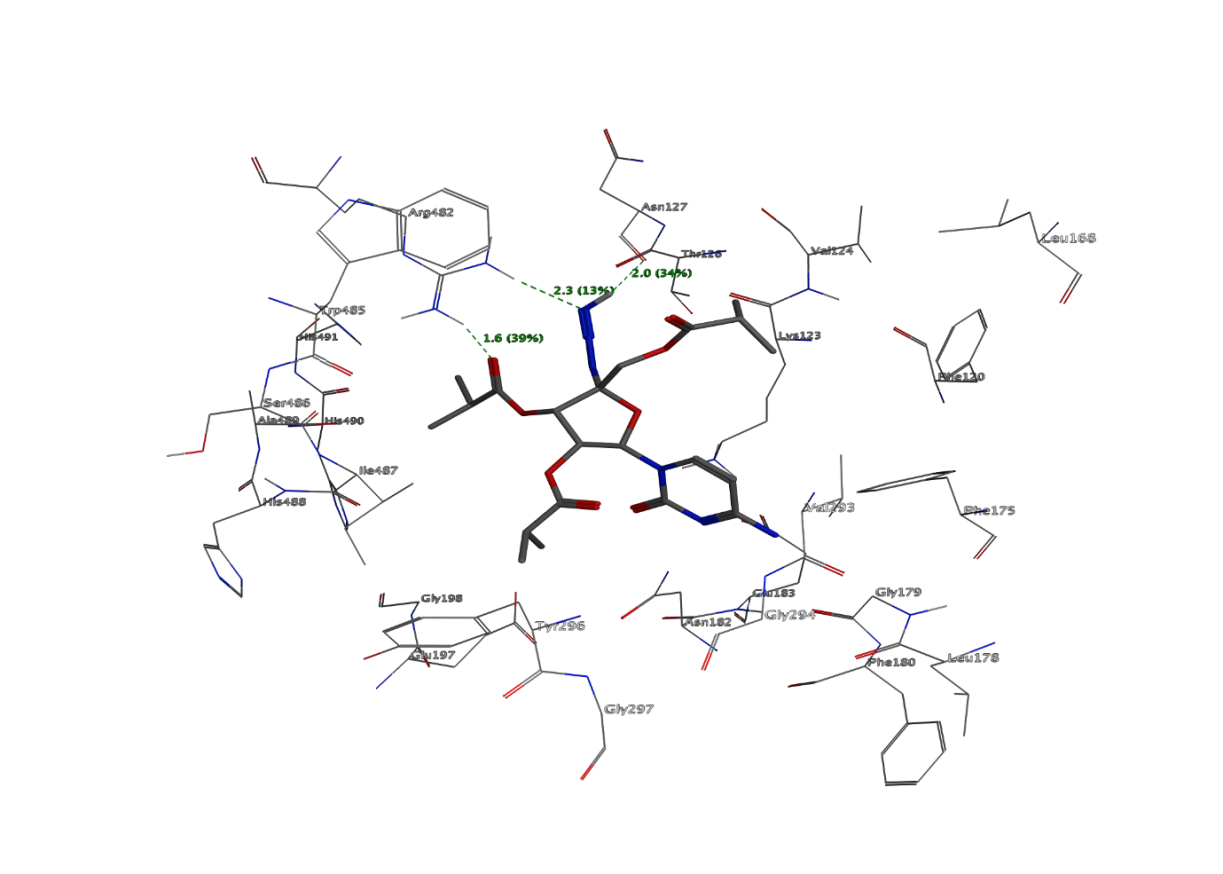
**

**Figure 6S:** 2D upper and 3D lower interaction of Balapiravir with 2J7U (Fitness score 49.42)

**
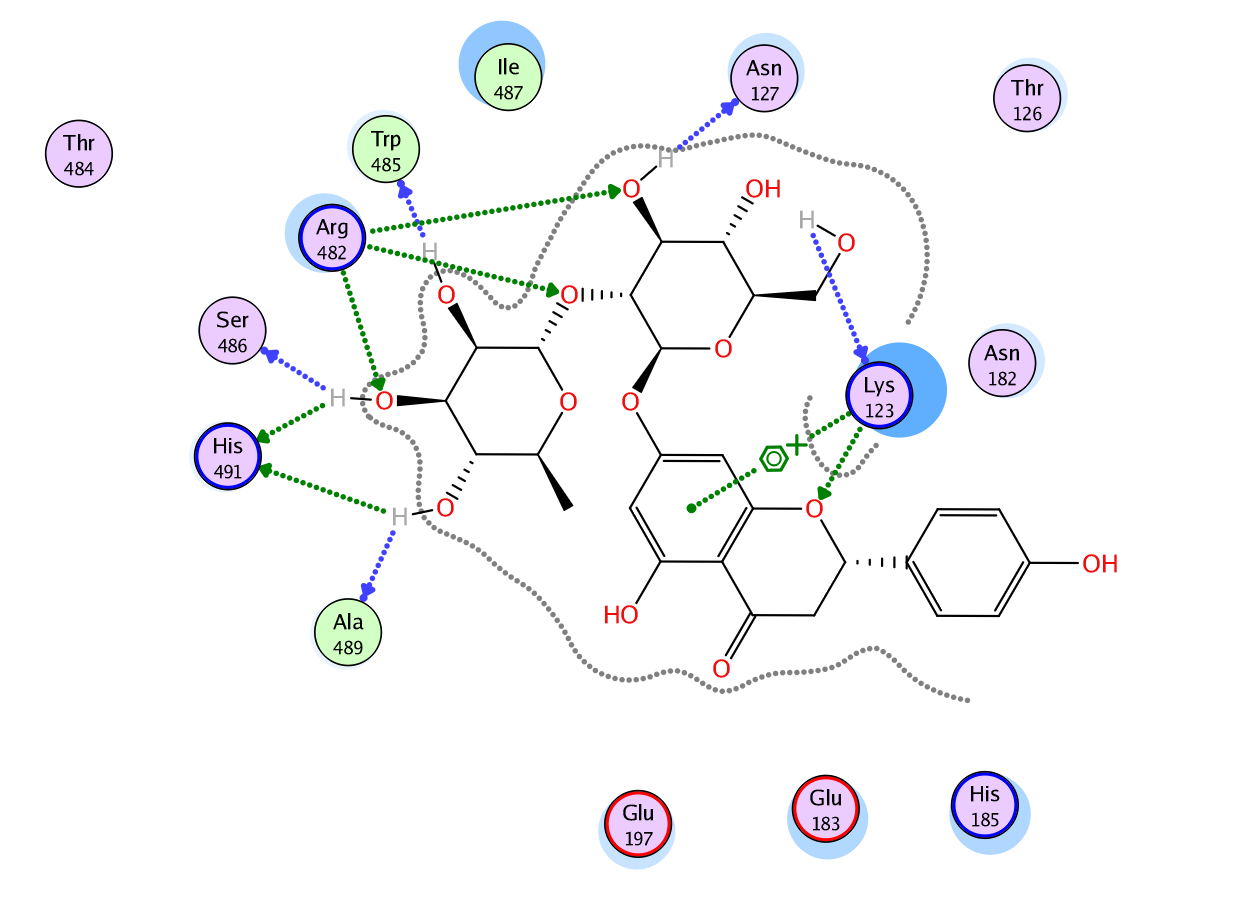
**

**
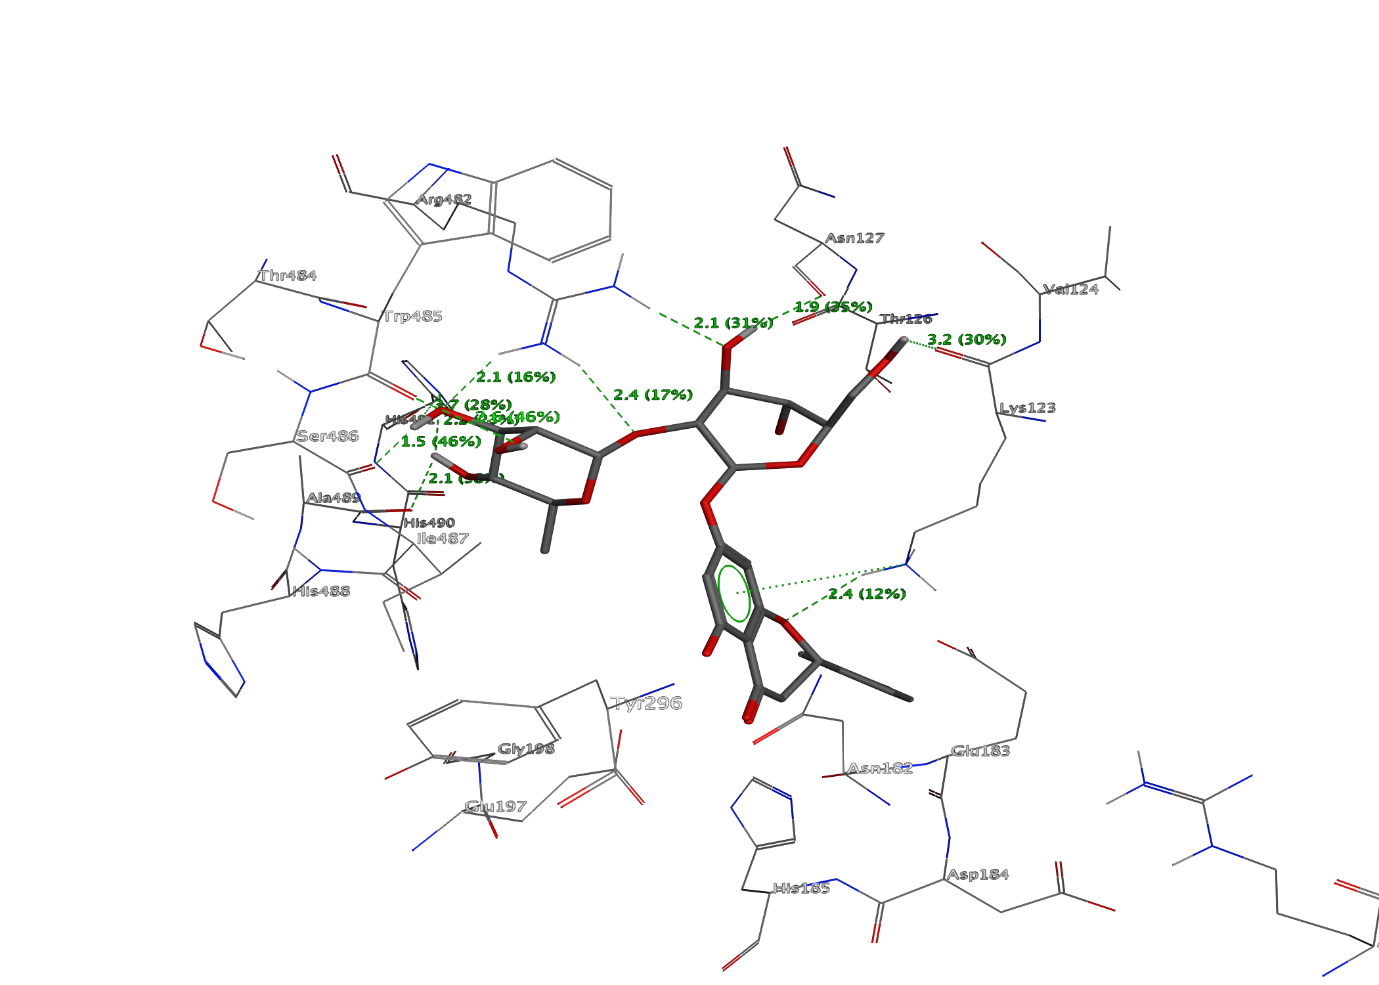
**

**Figure 7S: Upper 2D and lower 3D interaction of naringin with 2J7U (Fitness score 43.30)**

**References**

[1] M. Raekiansyah, C. C. Buerano, M. A. D. Luz, and K. Morita, “Inhibitory effect of the green tea molecule EGCG against dengue virus infection,” *Arch. Virol.*, vol. 163, no. 6, pp. 1649–1655, Jun. 2018, doi: 10.1007/s00705-018-3769-y.

[2] F.-R. Chang *et al.*, “Bioactive Phenolic Components from the Twigs of Atalantia buxifolia,” *J. Nat. Prod.*, vol. 81, no. 7, pp. 1534–1539, 27 2018, doi: 10.1021/acs.jnatprod.7b00938.

[3] T. S. Kiat, R. Pippen, R. Yusof, H. Ibrahim, N. Khalid, and N. A. Rahman, “Inhibitory activity of cyclohexenyl chalcone derivatives and flavonoids of fingerroot, Boesenbergia rotunda (L.), towards dengue-2 virus NS3 protease,” *Bioorg. Med. Chem. Lett.*, vol. 16, no. 12, pp. 3337–3340, 2006, doi: 10.1016/j.bmcl.2005.12.075.

[4] K. Whitby *et al.*, “Castanospermine, a Potent Inhibitor of Dengue Virus Infection In Vitro and In Vivo,” *J. Virol.*, vol. 79, no. 14, pp. 8698–8706, Jul. 2005, doi: 10.1128/JVI.79.14.8698-8706.2005.

[5] J.-C. Lee *et al.*, “Anti-Dengue Virus Constituents from Formosan Zoanthid Palythoa mutuki,” *Mar. Drugs*, vol. 14, no. 8, Art. no. 8, Aug. 2016, doi: 10.3390/md14080151.

[6] L. R. F. de Sousa *et al.*, “Flavonoids as noncompetitive inhibitors of Dengue virus NS2B-NS3 protease: Inhibition kinetics and docking studies,” *Bioorg. Med. Chem.*, vol. 23, no. 3, pp. 466–470, Feb. 2015, doi: 10.1016/j.bmc.2014.12.015.

[7] S. Mishra, A. Pandey, and S. Manvati, “Coumarin: An emerging antiviral agent,” *Heliyon*, vol. 6, no. 1, p. e03217, Jan. 2020, doi: 10.1016/j.heliyon.2020.e03217.

[8] I. Sánchez, F. Gómez‐Garibay, J. Taboada, and B. H. Ruiz, “Antiviral effect of flavonoids on the Dengue virus,” *Phytother. Res.*, vol. 14, no. 2, pp. 89–92, 2000, doi: 10.1002/(SICI)1099-1573(200003)14:2<89::AID-PTR569>3.0.CO;2-C.

[9] P. Gupta and A. Mahajan, “Approaches for the development of potential dengue inhibitors,” *Synth. Commun.*, vol. 0, no. 0, pp. 1–16, May 2020, doi: 10.1080/00397911.2020.1764584.

[10] G. C. Brandão, E. G. Kroon, D. E. R. Souza, J. D. Souza Filho, and A. B. Oliveira, “Chemistry and Antiviral Activity of Arrabidaea pulchra (Bignoniaceae),” *Mol. Basel Switz.*, vol. 18, no. 8, pp. 9919–9932, Aug. 2013, doi: 10.3390/molecules18089919.

[11] M. Bourjot *et al.*, “Chemical constituents of Anacolosa pervilleana and their antiviral activities,” *Fitoterapia*, vol. 83, no. 6, pp. 1076–1080, Sep. 2012, doi: 10.1016/j.fitote.2012.05.004.

[12] V. Leardkamolkarn and W. Sirigulpanit, “Establishment of a stable cell line coexpressing dengue virus-2 and green fluorescent protein for screening of antiviral compounds,” *J. Biomol. Screen.*, vol. 17, no. 3, pp. 283–292, Mar. 2012, doi: 10.1177/1087057111426903.

[13] E. Moghaddam *et al.*, “Baicalin, a metabolite of baicalein with antiviral activity against dengue virus,” *Sci. Rep.*, vol. 4, no. 1, Art. no. 1, Jun. 2014, doi: 10.1038/srep05452.

[14] K. Zandi, B. T. Teoh, S. S. Sam, P. F. Wong, M. R. Mustafa, and S. AbuBakar, “In vitro antiviral activity of fisetin, rutin and naringenin against dengue virus type-2,” *J. Med. Plants Res.*, vol. 5, no. 23, pp. 5534–5539, 2011.

[15] X. Yao *et al.*, “Tatanan A from the Acorus calamus L. root inhibited dengue virus proliferation and infections,” *Phytomedicine Int. J. Phytother. Phytopharm.*, vol. 42, pp. 258–267, Mar. 2018, doi: 10.1016/j.phymed.2018.03.018.

[16] K. Zandi, B.-T. Teoh, S.-S. Sam, P.-F. Wong, M. R. Mustafa, and S. Abubakar, “Antiviral activity of four types of bioflavonoid against dengue virus type-2,” *Virol. J.*, vol. 8, p. 560, Dec. 2011, doi: 10.1186/1743-422X-8-560.

[17] L. R. Simões, G. M. Maciel, G. C. Brandão, E. G. Kroon, R. O. Castilho, and A. B. Oliveira, “Antiviral activity of Distictella elongata (Vahl) Urb. (Bignoniaceae), a potentially useful source of anti-dengue drugs from the state of Minas Gerais, Brazil,” *Lett. Appl. Microbiol.*, vol. 53, no. 6, pp. 602–607, Dec. 2011, doi: 10.1111/j.1472-765X.2011.03146.x.

[18] P. Banerjee, A. O. Eckert, A. K. Schrey, and R. Preissner, “ProTox-II: a webserver for the prediction of toxicity of chemicals,” *Nucleic Acids Res.*, vol. 46, no. W1, pp. W257–W263, Jul. 2018, doi: 10.1093/nar/gky318.
